# Supplementary material for: Tubulation and dispersion of oil by bacterial growth on droplets
Source: Royal Society of Chemistry journal article supplement (doi:10.1039/d2sm00813k), 2022-01-01
Supplement: d2sm00813k1.pdf [file d2sm00813k1.pdf]

**Supplementary information for:**

**Tubulation and dispersion of oil by bacterial growth on droplets**

**Vincent Hickl and Gabriel Juarez**

**Schematic of microfluidic device**

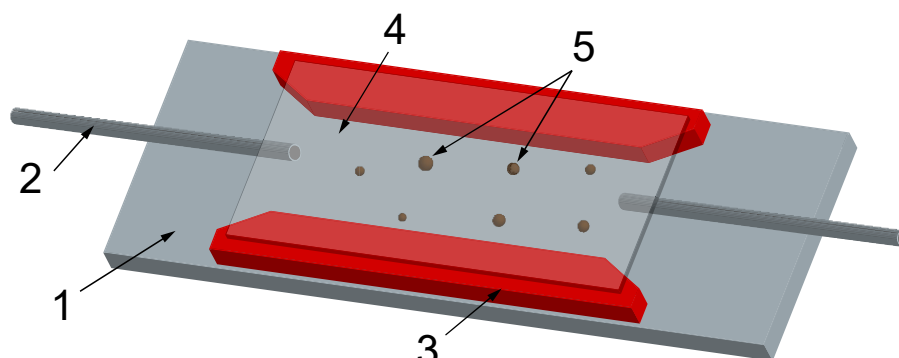

- |                  |                 |
|------------------|-----------------|
| 1. Glass slide   | 4. Cover slip   |
| 2. Inlet tube    | 5. Oil droplets |
| 3. Rubber spacer |                 |

**Figure S1:** Schematic of the microfluidic chamber used for prolonged droplet observation. Droplets are pinned to a glass slide and enclosed in a chamber into which dispersants, cells, and nutrients are injected. Adapted from Hickl and Juarez, *MarPolBull*, 2022.

**Supplementary videos:**

**Video 1: Droplet Evolution 1**

Timelapse of a droplet with initial radius  $R_0 = 16 \mu\text{m}$  colonized and deformed by bacteria. Buckling, tube extension, and secondary droplet formation are shown starting at  $t = 14 \text{ h}$ ,  $16 \text{ h}$ , and  $35 \text{ h}$ , respectively. Video was recorded at 40X magnification with one image taken every 10 minutes. Playback speed is 15 fps.

**Video 2: Droplet Evolution 2**

Timelapse of a droplet with initial radius  $R_0 = 51 \mu\text{m}$  colonized and deformed by bacteria. Buckling and bio-aggregate growth are shown starting at  $t = 15.5 \text{ h}$ , and  $18 \text{ h}$  respectively. Video was recorded at 40X magnification with one image taken every 10 minutes. Playback speed is 14 fps.

### **Video 3: Secondary droplet formation 1**

Timelapse of a tube on a droplet with initial radius  $R_0 = 17 \mu\text{m}$  after tube extension. The oil inside the tube shrinks towards the base of the tube and coalesces into a single secondary droplet of radius  $r = 4.9 \mu\text{m}$ . Video was recorded at 40X magnification with one image taken every 10 minutes. Playback speed is 20 fps.

### **Video 4: Secondary droplet formation 2**

Timelapse of a tube on a droplet with initial radius  $R_0 = 15 \mu\text{m}$  after tube extension. The oil inside the tube breaks up and coalesces into a two secondary droplet of radii  $r = 1.9 \mu\text{m}$  and  $r = 2.1 \mu\text{m}$ . Video was recorded at 40X magnification with one image taken every 10 minutes. Playback speed is 20 fps.
